# Supplementary material for: Spectroscopic insights into peri-implant mucositis and peri-implantitis: unveiling peri-implant crevicular fluid profiles using surface enhanced Raman scattering
Source: Royal Society of Chemistry journal article supplement (doi:10.1039/d3an01438j), 2023-12-27
Supplement: d3an01438j1.pdf [file d3an01438j1.pdf]

# Spectroscopic insights into peri-implant mucositis and peri-implantitis: unveiling peri-implant crevicular fluid profiles using surface enhanced Raman scattering

Stefano Fornasaro<sup>a,\*</sup>, Antonio Rapani<sup>b</sup>, Federica Farina<sup>b</sup>, Marigona Ibishi<sup>b</sup>, Giulia Pisoni<sup>b</sup>, Claudio Stacchi<sup>b</sup>, Valter Sergo<sup>c</sup>, Alois Bonifacio<sup>c</sup>, Roberto Di Lenarda<sup>b</sup>, Federico Berton<sup>b</sup>

<sup>a</sup>University of Trieste, Dept. of Chemical and Pharmaceutical Sciences, via L. Giorgeri 1, 34127 Trieste, Italy;

<sup>b</sup>Maxillofacial and Dental Surgical Clinic, Dept. of Medical, Surgical and Health Sciences, University of Trieste, Piazza dell'Ospitale 1, 34125, Trieste, Italy;

<sup>c</sup>Raman Spectroscopy Lab, Dept. of Engineering and Architecture, University of Trieste, via A. Valerio 6a, 34127 Trieste, Italy;

Corresponding author. Email (sfornasaro@units.it)

**Supplementary materials**

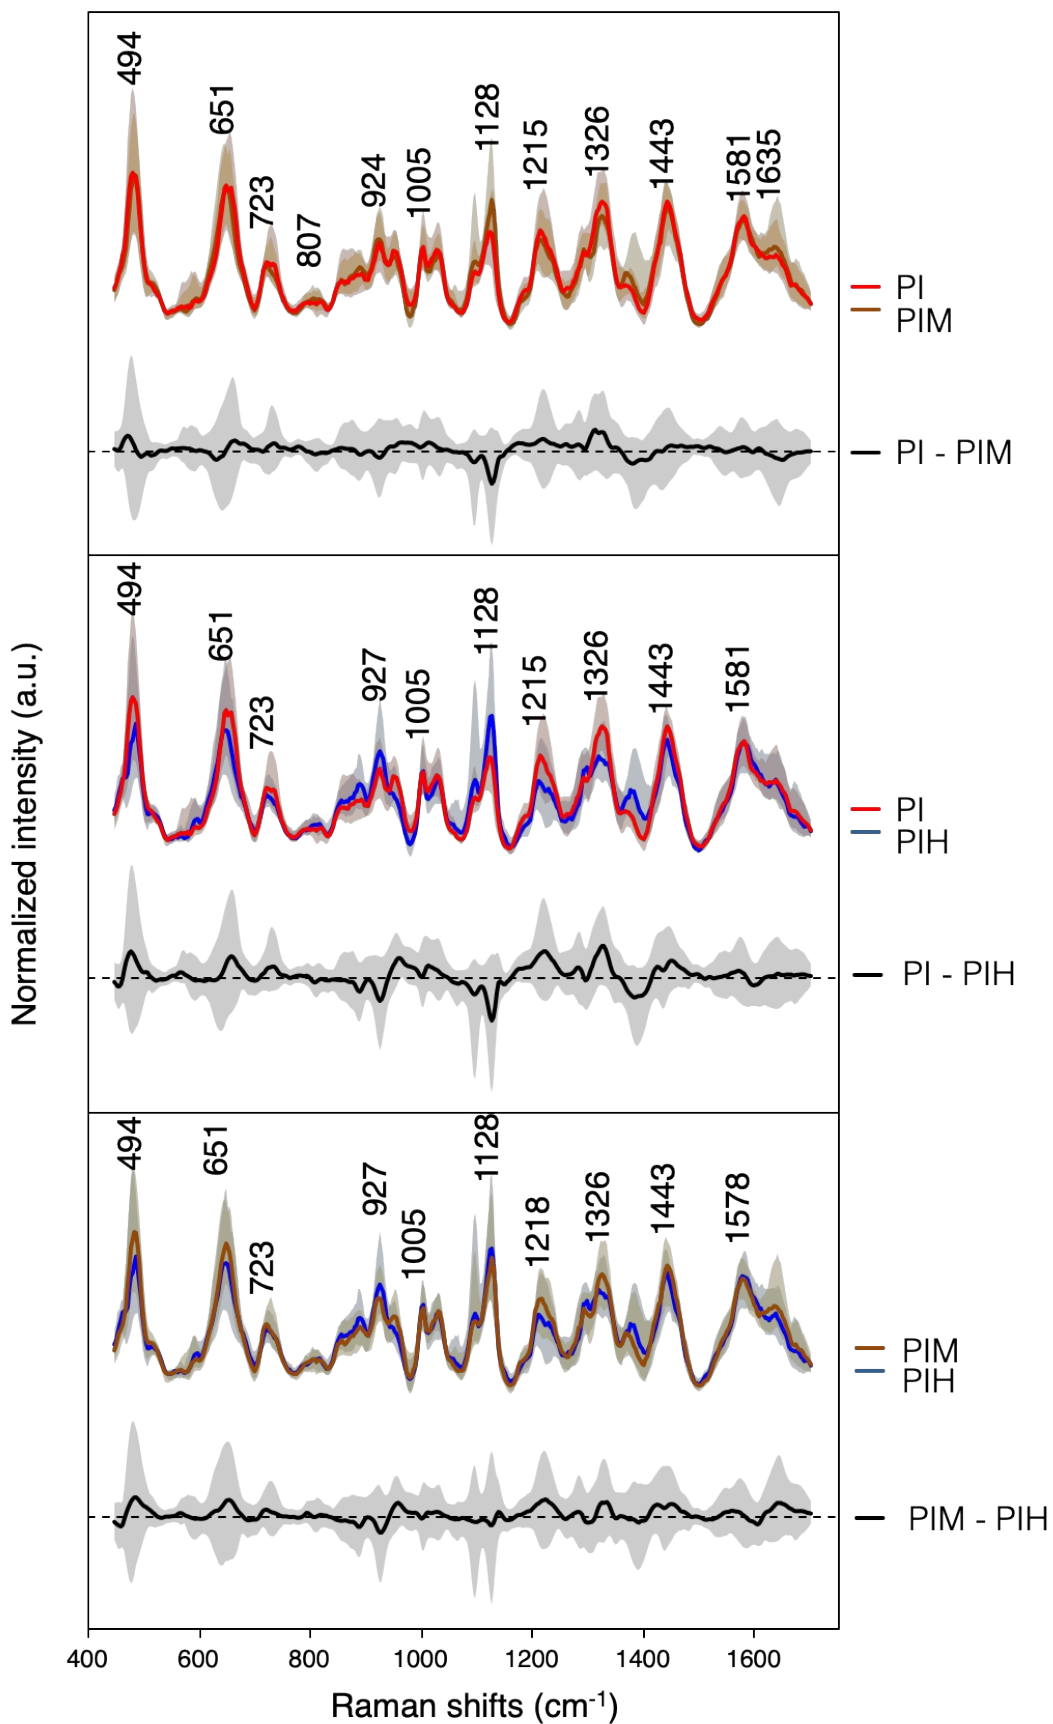

Figure S1. Comparison of median normalized SERS spectra of PICF samples collected from control (PIH, in blue), implants with peri-implant mucositis (PIM, in brown), and peri-implantitis (PI, in red), together with their difference spectrum (in black). The corresponding interquartile distributions are represented by the shaded area.

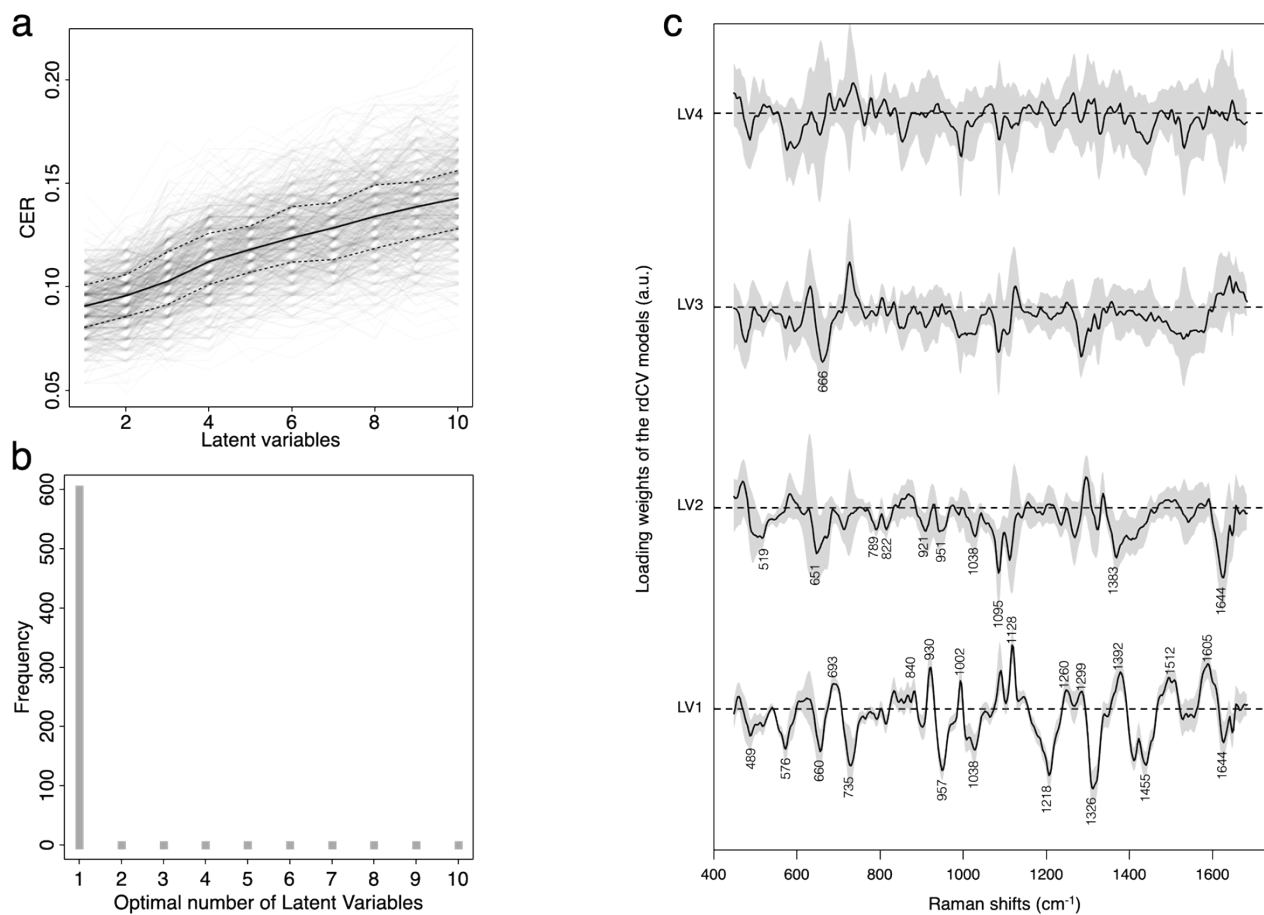

**Figure S2.** Characterization of the CPPLS-LDA models produced by the rdCV. **a** Curves for the inner cycle of the rdCV, showing the classification error rate (CER, %) when using a different number of latent variables; **b** Frequency plot for optimized models, showing the number of models generated (i.e., frequency) using a specific number of LV, as a consequence of model optimization; **c** Medians of the loading weights for latent variables 1-4, calculated over the optimized models from the rdCV; interquartile ranges are reported in gray.

*Table S1 Figures of merit.*

|            | <b>Sensitivity [95% CI]</b> | <b>Specificity [95% CI]</b> | <b>Accuracy [95% CI]</b> | <b>Precision [95% CI]</b> |
|------------|-----------------------------|-----------------------------|--------------------------|---------------------------|
| <b>PIM</b> | 0.89 [0.87-0.92]            | 0.92 [0.91-0.92]            | 0.91 [0.90-0.92]         | 0.85 [0.84-0.86]          |
| <b>PI</b>  | 0.90 [0.89-0.91]            | 0.96 [0.95-0.97]            | 0.94 [0.93-0.95]         | 0.92 [0.90-0.94]          |
| <b>PIH</b> | 0.93 [0.93-0.93]            | 0.98 [0.98-0.98]            | 0.96 [0.96-0.96]         | 0.96 [0.96-0.96]          |

*Table S2 Overview of sensitivity and specificity [95% CI].*

|                 | <b>PIM</b>          |                     | <b>PI</b>           |                     | <b>PIH</b>          |                     |
|-----------------|---------------------|---------------------|---------------------|---------------------|---------------------|---------------------|
|                 | <i>Sensitivity</i>  | <i>Specificity</i>  | <i>Sensitivity</i>  | <i>Specificity</i>  | <i>Sensitivity</i>  | <i>Specificity</i>  |
| <b>SERS</b>     | 0.91<br>[0.61-1.00] | 0.98<br>[0.82-1.00] | 0.87<br>[0.61-1.00] | 0.94<br>[0.78-1.00] | 0.90<br>[0.64-1.00] | 0.93<br>[0.76-1.00] |
| <b>Clinical</b> | 0.86<br>[0.77-0.96] | 0.95<br>[0.91-1.00] | 0.93<br>[0.85-1.00] | 0.95<br>[0.90-0.98] | 0.96<br>[0.90-1.00] | 0.96<br>[0.93-1.00] |
| <b>Fused</b>    | 0.89<br>[0.87-0.92] | 0.92<br>[0.91-0.92] | 0.90<br>[0.89-0.91] | 0.96<br>[0.95-0.97] | 0.93<br>[0.93-0.93] | 0.98<br>[0.98-0.98] |
